# Supplementary material for: Longitudinal stream synoptic monitoring tracks chemicals along watershed continuums: a typology of trends
Source: Frontiers journal article supplement (doi:10.3389/fenvs.2023.1122485), 2023-06-09
Supplement: Data_Sheet_1.PDF [file Data_Sheet_1.PDF]

## Supplemental Information

| Study Site                 | Latitude and Longitude at outflow | Watershed Area (km <sup>2</sup> ) | Watershed Forest Cover (%) | Watershed Impervious Surface Cover (%) | Watershed Urban Development (%) |
|----------------------------|-----------------------------------|-----------------------------------|----------------------------|----------------------------------------|---------------------------------|
| <i>Anacostia</i>           | 38.86106, -77.01287               | 448.1                             | 20.7                       | 35.3                                   | 72.2                            |
| <i>Northeast Branch</i>    | 38.94301, -76.94391               | 194.3                             | 27.5                       | 29                                     | 63                              |
| <i>Paint Branch</i>        | 38.97869, -76.91741               | 80.8                              | 25.2                       | 31.9                                   | 67.8                            |
| <i>Campus Creek</i>        | 38.99282, -76.93556               | 1.8                               | 22.1                       | 26.9                                   | 77.5                            |
| <i>Northwest Branch</i>    | 38.94316, -76.94435               | 135.5                             | 19.9                       | 33.5                                   | 71.5                            |
| <i>Sligo Creek</i>         | 38.98121, -76.99094               | 19.8                              | 12.2                       | 41.6                                   | 27.2                            |
| <i>Bull Run</i>            | 38.72412, -77.38027               | 502.5                             | 35.7                       | 13                                     | 44.3                            |
| <i>Gwynns Falls</i>        | 39.26859, -76.62651               | 173.3                             | 17.8                       | 42.3                                   | 79.9                            |
| <i>Rock Creek</i>          | 38.90008, -77.05738               | 198.1                             | 20.4                       | 32.4                                   | 71.4                            |
| <i>Scotts Level Branch</i> | 39.36058, -76.74620               | 10.4                              | 13.2                       | 39.3                                   | 83.8                            |

**Table 1.** Land use characteristics within each study sites watershed. The watershed urban development was from the NLDC 2011 classes 21-24. The watershed characteristics were obtained using StreamStats at the latitude and longitude at the outfall (U.S. Geological Survey, 2016; National Land Cover Database 2011 (NLCD2011) Legend).

### *Longitudinal and lateral sampling of water quality along the UWC*

Multiple longitudinal synoptic sampling locations were located throughout each of the above watersheds to investigate longitudinal changes in downstream concentrations and/or isotopic compositions of multiple chemical contaminants. In addition, we also sampled shallow groundwater at Scotts Level Branch along the flowpath from uplands to the stream channel using transects of piezometers. Methods of sampling for groundwater at Scotts Level Branch and details on groundwater well installation are in Wood et al. (2022). In each watershed, LSS monitoring was completed within 24 hours or on consecutive days with similar streamflow conditions. We did not always move downstream along a watershed during the day; in some cases, we moved upstream or sampled the entire watershed flowpath by multiple teams simultaneously throughout the day (e.g., sampling timing was sometimes different for flowpaths and data collection could sometimes rotate through upstream, downstream, and simultaneous collection along flowpaths). Thus, the chemical patterns along flowpaths were not due to diurnal patterns throughout the day. Our sampling resolution between sampling points varied based on the size of the watershed, but was typically hundreds of meters or a few kilometers; thus, we sampled in detail along the length of each watershed to evaluate where urban degradation occurred and/or restoration activities were implemented. In some cases, these flowpaths extended from headwaters to the stream outflow to receiving waters. Sampling locations for the synoptic sites along each mainstem were chosen based on accessibility, presence of tributary junctions, and positioning of conservation and restoration features.

## Gwynns Falls

a) 10/2008

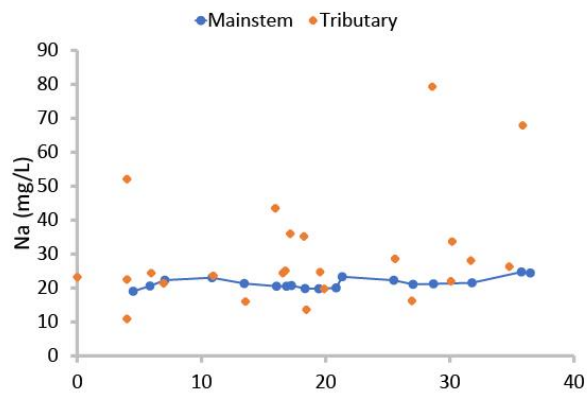

b) 12/2008

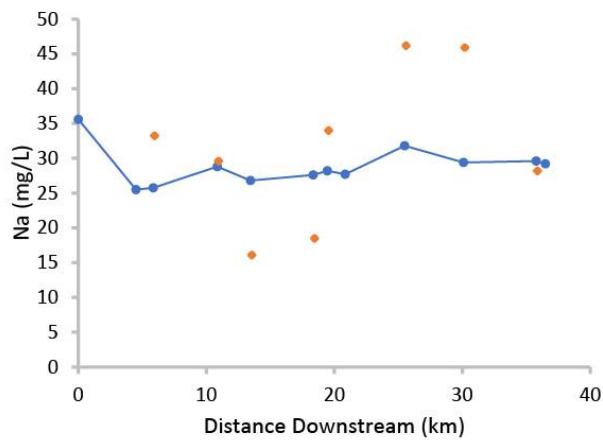

## Bull Run

c) 01/2021

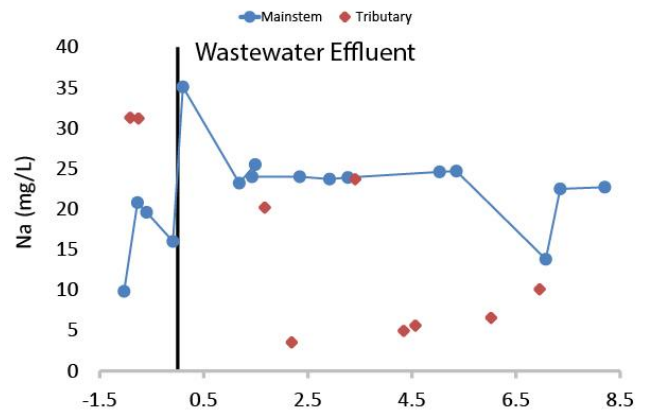

d) 09/2021

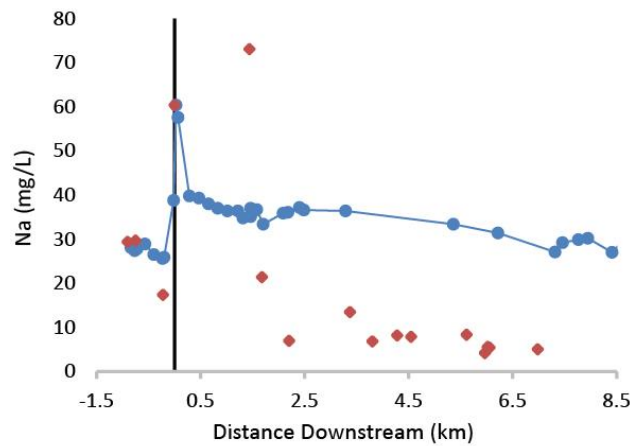

**Supplemental Figure 1.** Changes in Na concentrations along the Gwynns Falls mainstem are not substantially

| Figure Number | Parameter            | Equation                                                       | R <sup>2</sup> | p-values               |
|---------------|----------------------|----------------------------------------------------------------|----------------|------------------------|
| 4a            | Ca                   | $y = 0.014x^2 - 0.21x + 26.5$                                  | 0.78           | $3.5 \times 10^{-6}$   |
|               | Mg                   | $y = 0.0052x^2 - 0.096x + 10.7$                                | 0.51           | 0.001                  |
|               | S                    | $y = 0.0031x^2 - 0.015x + 2.35$                                | 0.92           | $1.7 \times 10^{-9}$   |
|               | B                    | $y = 0.0046e^{0.0398x}$                                        | 0.89           | $1.1 \times 10^{-8}$   |
|               | Mo                   | $y = 3 \times 10^{-5}x + 0.0054$                               | 0.23           | 0.028                  |
| 4b            | TDN                  | $y = 0.0021x^2 - 0.11x + 2.37$                                 | 0.51           | 0.011                  |
|               | Ba                   | $y = -0.0011x + 0.0727$                                        | 0.73           | $7.21 \times 10^{-7}$  |
|               | Mn                   | $y = -0.0007x + 0.0439$                                        | 0.30           | 0.010                  |
| 4d            | Ca                   | $y = 0.39x^2 - 4.23x + 50.3$                                   | 0.80           | 0.027                  |
|               | Mg                   | $y = 0.56x^2 - 6.22x + 25.45$                                  | 0.90           | 0.011                  |
|               | Ba                   | $y = -0.0104x + 0.16$                                          | 0.71           | 0.001                  |
| 4e            | Fe                   | $y = -0.0054x^2 + 0.0502x + 0.045$                             | 0.79           | 0.32                   |
|               | Mn                   | $y = -0.0013x^3 + 0.018x^2 - 0.073x + 0.12$                    | 0.48           | 0.11                   |
| 4f            | K: After restoration | $y = 0.18x + 1.12$                                             | 0.99           | 0.053                  |
|               | K: After Park        | $y = -0.14x + 2.39$                                            | 0.93           | 0.002                  |
|               | Sr: Upstream         | $y = -0.0024x + 0.16$                                          | 0.79           | 0.000                  |
| 5             | TDN                  | $y = 2.98x^2 - 4x + 2.18$                                      | 0.86           | 0.00016                |
|               | Ba                   | $y = -0.031x + 0.066$                                          | 0.75           | $7.81 \times 10^{-6}$  |
|               | S                    | $y = 2.99x + 1.9$                                              | 0.52           | 0.0011                 |
|               | B                    | $y = 0.03x^2 + 0.012x + 0.0075$                                | 0.77           | $7.1 \times 10^{-5}$   |
| 6             | N <sub>2</sub> O     | $y = 7 \times 10^{-5}x^2 - 0.0039x + 0.068$                    | 0.64           | $8.0 \times 10^{-5}$   |
|               | CO <sub>2</sub>      | $y = 0.37x^2 - 19.54x + 272.45$                                | 0.50           | 0.001                  |
|               | DOC                  | $y = 8 \times 10^{-5}x^4 - 0.0068x^3 + 0.19x^2 - 1.64x + 5.62$ | 0.59           | 0.087                  |
|               | HIX                  | $y = 0.0001x^2 - 0.0056x + 0.8557$                             | 0.45           | 0.020                  |
| 7: Na         | 01/17/22             | $y = 2.99x + 204.95$                                           | 0.42           | 0.023                  |
|               | 04/13/22             | $y = -1.50x + 49.42$                                           | 0.56           | 0.0021                 |
|               | 05/10/22             | $y = -1.59x + 32.76$                                           | 0.80           | $1.68 \times 10^{-5}$  |
|               | 06/18/22             | $y = -1.90x + 38.26$                                           | 0.96           | $5.31 \times 10^{-10}$ |
|               | 08/15/22             | $y = -1.54x + 24.87$                                           | 0.74           | $8.06 \times 10^{-5}$  |
| 7: K          | 04/13/22             | $y = -0.070 + 3.81$                                            | 0.41           | $1.33 \times 10^{-2}$  |
|               | 08/15/22             | $y = -0.10 + 3.91$                                             | 0.67           | $3.32 \times 10^{-4}$  |
| 9: Mn         | 7/5/2022             | $y = 0.0141x^2 - 0.6213x + 7.0155$                             | 0.1171         |                        |
|               | 7/15/2022            | $y = 0.0585x^2 - 2.523x + 27.286$                              | 0.2322         |                        |
|               | 7/19/2022            | $y = 0.0391x^2 - 1.5889x + 16.395$                             | 0.556          |                        |
|               | 8/2/2022             | $y = 0.0636x^2 - 2.7465x + 29.653$                             | 0.7908         |                        |
|               | 8/9/2022             | $y = 0.0502x^2 - 2.1435x + 23.005$                             | 0.449          |                        |
|               | 8/16/2022            | $y = 0.0411x^2 - 1.7638x + 18.999$                             | 0.68           |                        |
|               | 8/23/2022            | $y = 0.0164x^2 - 0.7269x + 8.1688$                             | 0.337          |                        |
|               | 8/31/2022            | $y = 0.059x^2 - 2.5754x + 28.041$                              | 0.688          |                        |
|               | 9/14/2022            | $y = 0.0293x^2 - 1.2408x + 13.186$                             | 0.393          |                        |
|               | 9/26/2022            | $y = 0.0246x^2 - 1.0348x + 10.902$                             | 0.320          |                        |
| 9: Fe         | 7/5/2022             | $y = 0.0209x^2 - 0.95x + 11.428$                               | 0.2283         |                        |
|               | 7/15/2022            | $y = 0.0244x^2 - 1.1393x + 13.417$                             | 0.8173         |                        |
|               | 7/19/2022            | $y = 0.0464x^2 - 2.1349x + 25.166$                             | 0.8358         |                        |
|               | 8/2/2022             | $y = 0.0894x^2 - 3.8135x + 41.024$                             | 0.8136         |                        |
|               | 8/9/2022             | $y = 0.0266x^2 - 1.1045x + 12.297$                             | 0.4064         |                        |

|     |                                                               |                                                                                                                                                                                             |                                                |                                                           |
|-----|---------------------------------------------------------------|---------------------------------------------------------------------------------------------------------------------------------------------------------------------------------------------|------------------------------------------------|-----------------------------------------------------------|
|     | 8/16/2022<br>8/23/2022<br>8/31/2022<br>9/14/2022<br>9/26/2022 | $y = -0.0074x^2 + 0.4402x - 5.3567$<br>$y = 0.0063x^2 - 0.2494x + 2.9941$<br>$y = 0.0315x^2 - 1.3581x + 15.006$<br>$y = 0.0276x^2 - 1.1284x + 12.157$<br>$y = 0.0235x^2 - 0.9984x + 10.766$ | 0.8587<br>0.5704<br>0.4081<br>0.6657<br>0.4191 |                                                           |
| 10d | Na<br>Ca<br>Mg                                                | $y = 83.4x10^{-1.01}x$<br>$y = 3.15x^2 - 29.67x + 71$<br>$y = -3.58x + 14.64$                                                                                                               | 0.83<br>0.99<br>0.90                           |                                                           |
| 13b | Na<br>Temperature<br>DIC                                      | $y = 0.03x + 0.27$<br>$y = 1.42x + 1.38$<br>$y = 2.16x + 18.75$                                                                                                                             | 0.48<br>0.89<br>0.44                           | $1.87 \times 10^{-7}$<br>0.010<br>0.026                   |
| 13d | BIX<br>FI<br>K                                                | $y = 0.028x + 0.65$<br>$y = 0.054x + 1.45$<br>$y = -1.06x^2 + 9.33x - 12.32$                                                                                                                | 0.95<br>0.85<br>0.82                           | $5.26 \times 10^{-11}$<br>$8.38 \times 10^{-13}$<br>0.017 |

**Supplemental Table 2.** Equations, p values, and R<sup>2</sup> values for relationships shown in the figures.
